# Supplementary material
Source: Springer Nature journal article supplement (https://www.springermedizin.de/resource/supplementary/13058_2010_2616_MOESM10_ESM.pdf/9702152)

(a) ANKRD46 EIF4A2

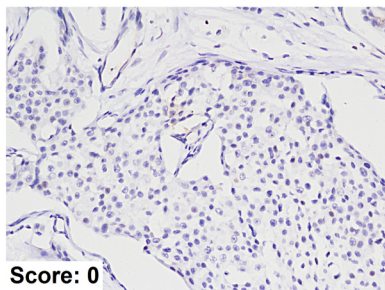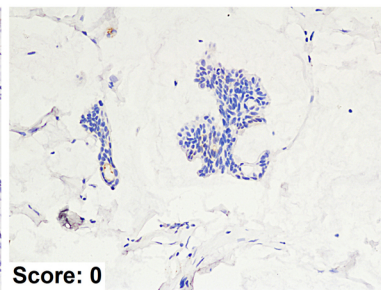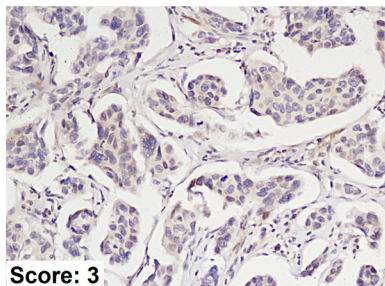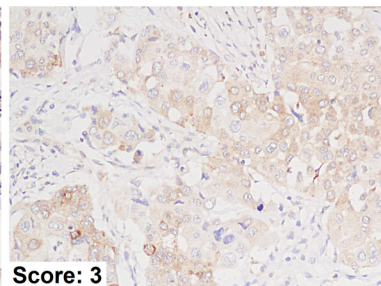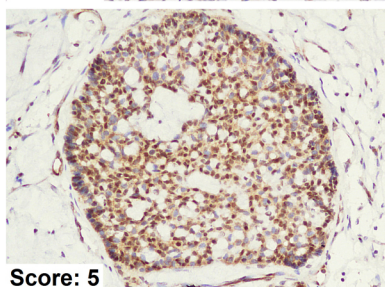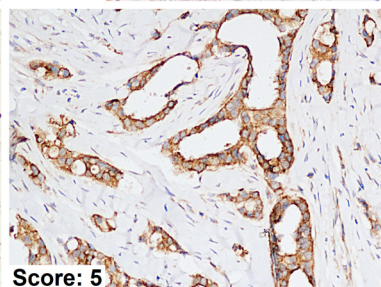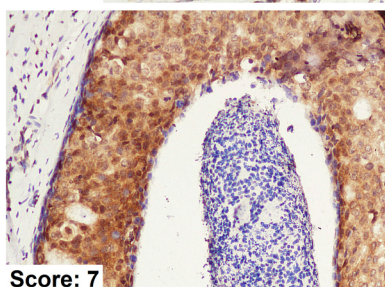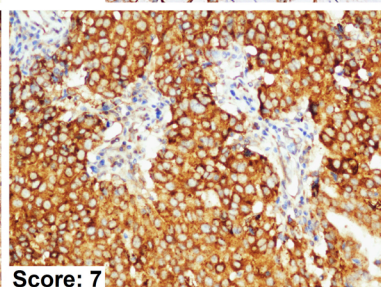

(b) OS curves

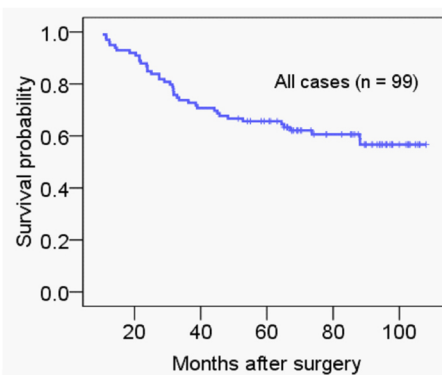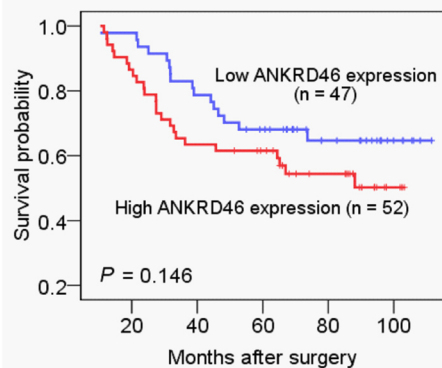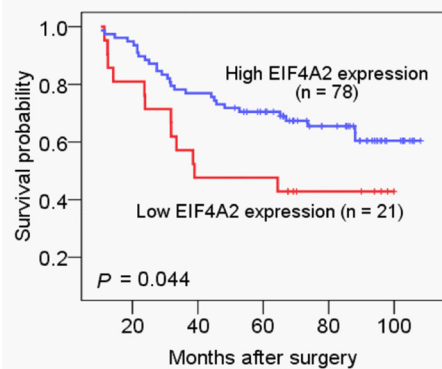

Supplement: MOESM10 [file 9702152]
